# Supplementary material for: The Abundance and Taxonomic Diversity of Filterable Forms of Bacteria during Succession in the Soils of Antarctica (Bunger Hills)
Source: MDPI journal article supplement (doi:10.3390/microorganisms9081728), 2021-08-13
Supplement: s1 [file s1]

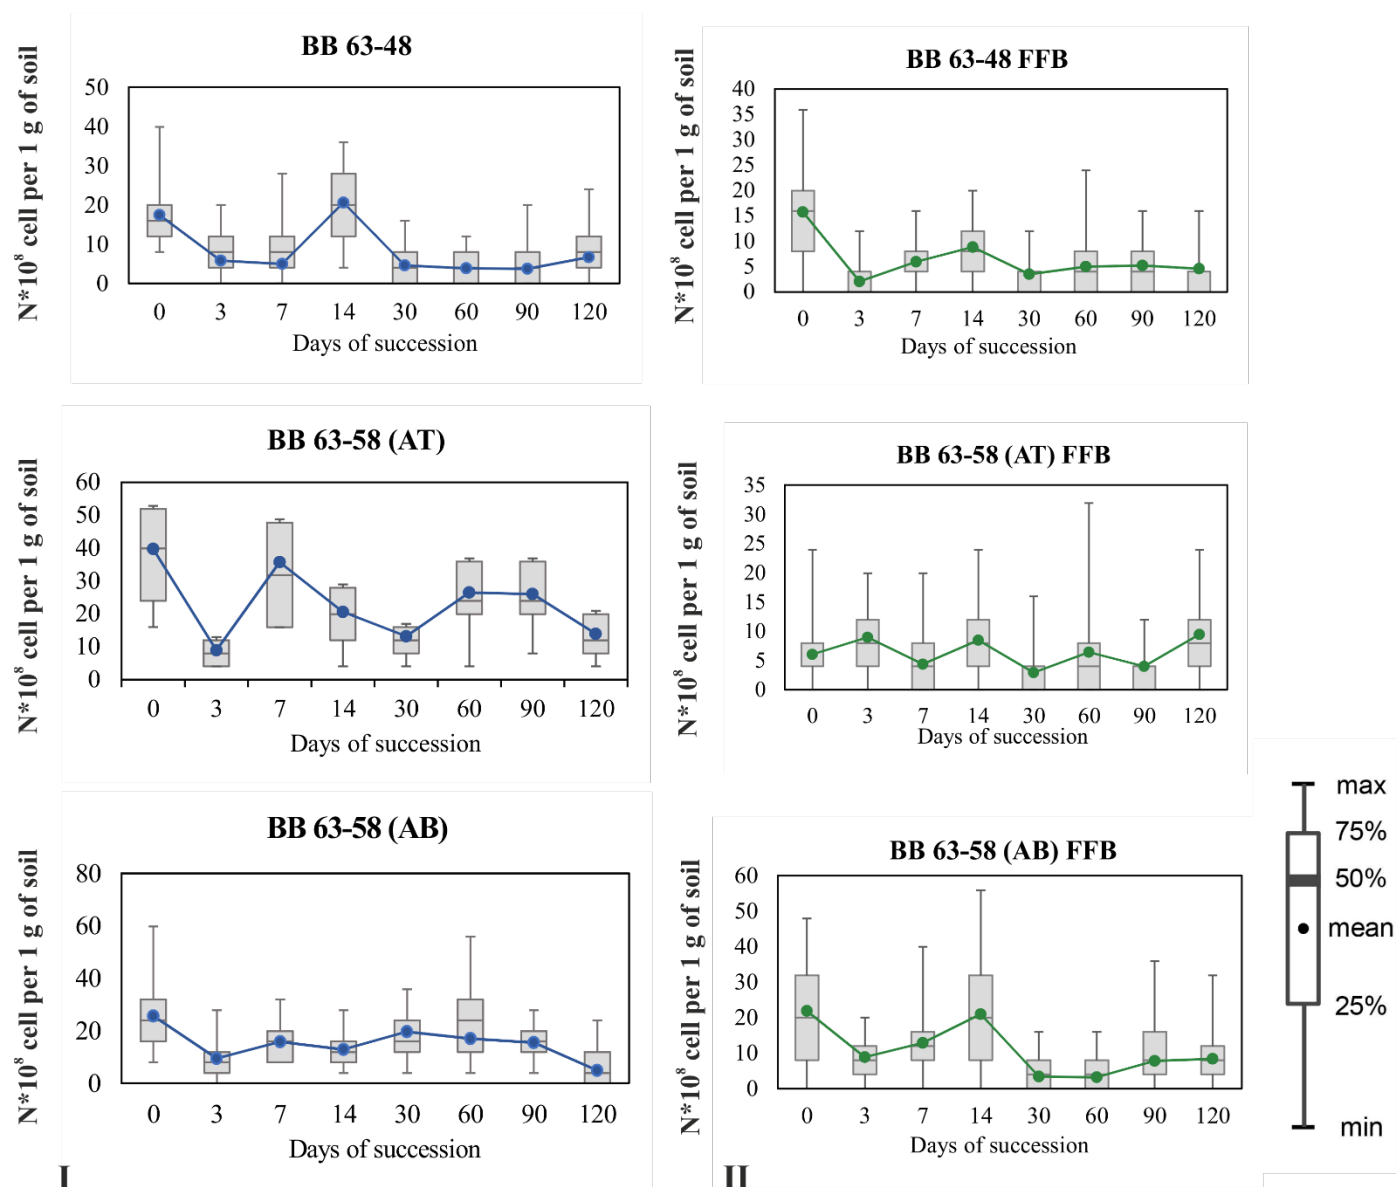

**Figure S1.** Dynamics of the total number of bacteria and FFB in the studied soils, incubation temperature 5°C: I – soil (total cells); II – FFB

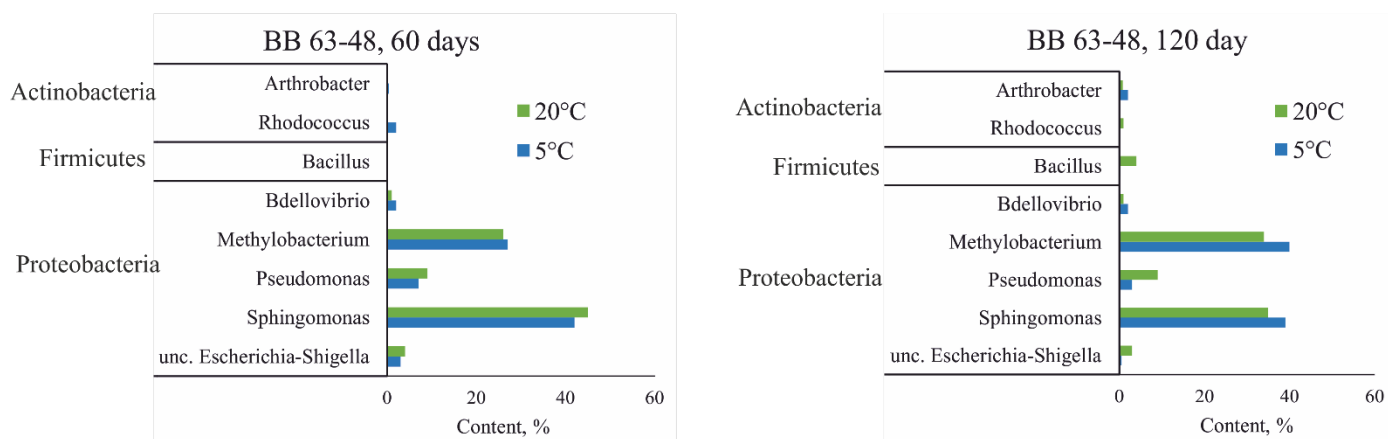

**Figure 2.** Distribution of dominant phyla in sample BB 63-48

**Table S1.** OTUs which are present only in the filtrate / in the soil

| Phylum                  | Class                       | The filtrate                               | Soil suspension                                      |
|-------------------------|-----------------------------|--------------------------------------------|------------------------------------------------------|
| <i>Proteobacteria</i>   | <i>Alpha-proteobacteria</i> | <i>Ochrobactrum</i>                        | <i>Rhodospirillaceae</i>                             |
|                         |                             | <i>Roseomonas</i>                          | <i>Polymorphobacter</i>                              |
|                         |                             | <i>Paracoccus</i>                          | Uncultured ( <i>Sphingomonadales</i> )               |
|                         |                             | <i>Afipia</i>                              | Uncultured ( <i>Rickettsiales</i> )                  |
|                         |                             |                                            | Uncultured (Cand. <i>Odyssella</i> )                 |
|                         |                             |                                            | Uncultured ( <i>Holosporaceae</i> )                  |
|                         |                             |                                            | Uncultured ( <i>Rickettsiaceae</i> )                 |
|                         |                             |                                            | <i>Rhizobiales</i>                                   |
|                         |                             |                                            | <i>Devosia</i>                                       |
|                         |                             |                                            | Ambiguous taxa (LWSR-14)                             |
|                         |                             |                                            | <i>Rhodoplanes</i>                                   |
|                         |                             |                                            | <i>Methylocella</i>                                  |
|                         |                             |                                            | <i>Inquilinus</i>                                    |
|                         | <i>Beta-proteobacteria</i>  | <i>Achromobacter</i>                       | Uncultured ( <i>Comamonadaceae</i> )                 |
|                         |                             | <i>Polaromonas</i>                         | <i>Limnobacter</i>                                   |
|                         |                             | <i>Delftia</i>                             | <i>Nitrosomonadales</i>                              |
|                         |                             | <i>Ralstonia</i>                           | Uncultured ( <i>Neisseriales</i> )                   |
|                         |                             | <i>Methylophilaceae</i>                    | <i>Rhodocyclales</i>                                 |
|                         |                             | <i>Hydrogenophilaceae</i>                  | <i>Noviherbaspirillum</i>                            |
|                         | <i>Delta-proteobacteria</i> | -                                          | Uncultured <i>Alcaligenaceae</i>                     |
|                         |                             |                                            | <i>Phaselicystis</i>                                 |
|                         |                             |                                            | Ambiguous taxa (KD3-10)                              |
|                         |                             |                                            | <i>Polyangiaceae</i> (Blrii41)                       |
|                         |                             |                                            | Uncultured <i>Desulfovibrionales</i>                 |
|                         | <i>Gamma-proteobacteria</i> | Uncultured ( <i>Escherichia-Shigella</i> ) | Uncultured <i>Oligoflexaceae</i>                     |
|                         |                             |                                            | <i>Rhodanobacter</i>                                 |
|                         |                             |                                            | <i>Dokdonella</i>                                    |
|                         |                             |                                            | <i>Coxiella</i>                                      |
|                         |                             |                                            | <i>Acidiferrobacteraceae</i>                         |
|                         |                             |                                            | Ambiguous taxa (HTA4)                                |
| <i>Chloroflexi</i>      | Ambiguous class             | -                                          | Ambiguous taxa (JG37-AG-4)                           |
| <i>Actinobacteria</i>   | <i>Actinobacteria</i>       | <i>Blastococcus</i>                        | <i>Sporichthyaceae</i>                               |
|                         |                             | <i>Geodermatophilus</i>                    | Uncultured <i>Micromonosporaceae</i>                 |
|                         |                             | <i>Arthrobacter</i>                        |                                                      |
|                         |                             | <i>Micrococcus</i>                         |                                                      |
|                         |                             | <i>Agrococcus</i>                          |                                                      |
|                         |                             | <i>Rhodococcus</i>                         |                                                      |
|                         |                             | <i>Kocuria</i>                             |                                                      |
|                         |                             | Uncultured <i>Frankiales</i>               |                                                      |
|                         | <i>Thermoleophilia</i>      |                                            | <i>Solirubrobacterales</i> (0319-6M6)                |
| <i>Acidobacteria</i>    |                             | -                                          | -                                                    |
| <i>Bacteroidetes</i>    | <i>Flavobacteriia</i>       | <i>Chryseobacterium</i>                    |                                                      |
|                         |                             | <i>Flavobacterium</i>                      |                                                      |
|                         | <i>Cytophagia</i>           | <i>Rufibacter</i>                          | <i>Sporocytophaga</i>                                |
|                         |                             | <i>Hymenobacter</i>                        |                                                      |
|                         | <i>Sphingobacteriia</i>     | <i>Pedobacter</i>                          | <i>Sphingobacterium</i>                              |
| <i>Verrucomicrobia</i>  | Ambiguous class             | -                                          | Ambiguous taxa (OPB35 soil group)                    |
| <i>Gemmatimonadetes</i> | <i>Gemmatimonadetes</i>     | -                                          | <i>Gemmatimonadaceae</i> (Uncultured soil bacterium) |

|                   |                   |   |                      |
|-------------------|-------------------|---|----------------------|
|                   |                   |   | <i>Gemmatirosa</i>   |
| <i>Firmicutes</i> | <i>Clostridia</i> | - | <i>Anaerococcus</i>  |
|                   |                   |   | <i>Clostridium</i>   |
|                   | <i>Bacilli</i>    |   | <i>Paenibacillus</i> |
|                   |                   |   | <i>Streptococcus</i> |

**Table S2.** The number of bacteria grown on agar nutrient media (thousand CFU in 1 g of soil)

| Sample           | T    | Media | Succession points, number of days |     |      |      |      |      |     |     |
|------------------|------|-------|-----------------------------------|-----|------|------|------|------|-----|-----|
|                  |      |       | 0                                 | 3   | 7    | 14   | 30   | 60   | 90  | 120 |
| BB 63-48         | 5°C  | TSA   | 0                                 | 0   | 0    | 0    | 0    | 0    | 0   | 0   |
|                  |      | R-2A  | 0                                 | 0   | 0    | 0    | 0    | 0    | 0   | 0   |
|                  | 20°C | TSA   | 0                                 | 19  | 10   | 0    | 13   | 35   | 14  | 4   |
|                  |      | R-2A  | 0                                 | 15  | 0    | 0    | 16   | 29   | 3   | 8   |
| BB 63-58<br>(AT) | 5°C  | TSA   | 15                                | 55  | 220  | 100  | 179  | 100  | 287 | 950 |
|                  |      | R-2A  | 78                                | 130 | 280  | 190  | 184  | 350  | 480 | 670 |
|                  | 20°C | TSA   | 15                                | 130 | 180  | 210  | 340  | 80   | 240 | 670 |
|                  |      | R-2A  | 78                                | 100 | 450  | 320  | 530  | 135  | 570 | 930 |
| BB 63-58<br>(AB) | 5°C  | TSA   | 40                                | 10  | 36   | 10   | 88   | 17   | 18  | 8   |
|                  |      | R-2A  | 35                                | 15  | 36   | 180  | 222  | 8    | 29  | 6   |
|                  | 20°C | TSA   | 40                                | 80  | 1090 | 840  | 1050 | 1000 | 570 | 200 |
|                  |      | R-2A  | 35                                | 520 | 820  | 1325 | 900  | 1500 | 610 | 300 |

**Table 3.** Taxonomic structure of the heterotrophic bacterial complex along the course of succession

| Succession points | Sample        | 5°C                            |                                | 20°C                                                                                                                                                                                               |                                                                                                                          |
|-------------------|---------------|--------------------------------|--------------------------------|----------------------------------------------------------------------------------------------------------------------------------------------------------------------------------------------------|--------------------------------------------------------------------------------------------------------------------------|
|                   |               | TSA                            | R-2A                           | TSA                                                                                                                                                                                                | R-2A                                                                                                                     |
| 0                 | BB 63-48      | -                              | -                              | -                                                                                                                                                                                                  | -                                                                                                                        |
|                   | BB 63-58 (AT) | <i>Variovorax ginsengisoli</i> | <i>Variovorax ginsengisoli</i> | -                                                                                                                                                                                                  | <i>Cellulomonas sp.</i><br><i>Sphingomonas sp.</i><br><i>Mesorhizobium australicum</i><br><i>Blastococcus aggregatus</i> |
|                   | BB 63-58 (AB) | <i>Pseudomonas sp.</i>         | <i>Pseudomonas sp.</i>         | -                                                                                                                                                                                                  | <i>Arthrobacter sp.</i>                                                                                                  |
| 3 days            | BB 63-48      | -                              | -                              | <i>Chryseobacterium montanum</i><br><i>Micrococcus endophyticus</i><br><i>Gordonia didemni</i><br><i>Gordonia hongkongensis/terrae</i><br><i>Dietzia maris</i><br><i>Methylobacterium podarium</i> | <i>Rhodococcus sp.</i>                                                                                                   |
|                   | BB 63-58 (AT) | -                              | <i>Variovorax ginsengisoli</i> | -                                                                                                                                                                                                  | <i>Variovorax ginsengisoli</i>                                                                                           |
|                   | BB 63-58 (AB) | <i>Pseudomonas sp.</i>         | <i>Pseudomonas sp.</i>         | <i>Pseudomonas sp.</i>                                                                                                                                                                             | <i>Sphingomonas sp.</i><br><i>Micrococcus sp.</i><br><i>Arthrobacter sp.</i><br><i>Pseudomonas sp.</i>                   |
| 7 days            | BB 63-48      | -                              | -                              | <i>Arthrobacter sp.</i>                                                                                                                                                                            | -                                                                                                                        |
|                   | BB 63-58 (AT) | <i>Pseudomonas sp.</i>         | <i>Pseudomonas sp.</i>         | <i>Pseudomonas sp.</i>                                                                                                                                                                             | <i>Brevundimonas vesicularis</i>                                                                                         |
|                   | BB 63-58 (AB) | <i>Pseudomonas sp.</i>         | <i>Pseudomonas sp.</i>         | <i>Bacillus halosaccharovorans</i><br><i>Pseudomonas sp.</i>                                                                                                                                       | <i>Pseudomonas sp.</i>                                                                                                   |
| 14 days           | BB 63-48      | -                              | -                              | -                                                                                                                                                                                                  | -                                                                                                                        |
|                   | BB 63-58 (AT) | <i>Pseudomonas sp.</i>         | <i>Pseudomonas sp.</i>         | <i>Pseudomonas sp.</i><br><i>Pseudoarthrobacter sp.</i>                                                                                                                                            | <i>Pseudomonas sp.</i><br><i>Mesorhizobium australicum</i>                                                               |
|                   | BB 63-58 (AB) | <i>Pseudomonas sp.</i>         | <i>Pseudomonas sp.</i>         | <i>Pseudomonas sp.</i><br><i>Pseudoarthrobacter sp.</i>                                                                                                                                            | <i>Pseudomonas sp.</i>                                                                                                   |
| 30 days           | BB 63-48      | -                              | -                              | <i>Methylobacterium extorquens</i><br><i>Arthrobacter sp.</i><br><i>Pseudomonas sp.</i>                                                                                                            | <i>Methylobacterium extorquens</i><br><i>Arthrobacter sp.</i><br><i>Moraxella osloensis</i><br><i>Sphingomonas sp.</i>   |
|                   | BB 63-58 (AT) | <i>Pseudomonas sp.</i>         | <i>Pseudomonas sp.</i>         | <i>Pseudomonas sp.</i>                                                                                                                                                                             | <i>Pseudomonas sp.</i><br><i>Rhizobacter profundi</i><br><i>Mesorhizobium australicum</i><br><i>Bacillus sp.</i>         |

|             |                  |                                                      |                                                                      |                                                                        |                                                                                                                                                        |
|-------------|------------------|------------------------------------------------------|----------------------------------------------------------------------|------------------------------------------------------------------------|--------------------------------------------------------------------------------------------------------------------------------------------------------|
|             | BB 63-58<br>(AB) | <i>Pseudomonas</i><br>sp.<br><i>Agreia</i> sp.       | <i>Leifsonia</i> sp.<br><i>Pseudomonas</i> sp.                       | <i>Pseudomonas</i> sp.                                                 | <i>Pseudomonas</i> sp.<br><i>Pseudarthrobacter</i> sp.                                                                                                 |
| 60<br>days  | BB 63-48         | -                                                    | -                                                                    | <i>Pseudomonas</i> sp.<br><i>Brevundimonas</i><br><i>vesicularis</i>   | <i>Pseudomonas</i> sp.<br><i>Arthrobacter oryzae</i><br><i>Sphingobium xenophagum</i><br><i>Sphingomonas</i> sp.<br><i>Roseomonas</i> sp.              |
|             | BB 63-58<br>(AT) | <i>Pseudomonas</i><br>sp.                            | <i>Pseudomonas</i> sp.                                               | <i>Pseudomonas</i> sp.                                                 | <i>Pseudomonas</i> sp.                                                                                                                                 |
|             | BB 63-58<br>(AB) | <i>Pseudomonas</i><br>sp.                            | <i>Pseudomonas</i> sp.<br><i>Blastococcus</i><br><i>aggregatus</i>   | <i>Pseudomonas</i> sp.                                                 | <i>Pseudomonas</i> sp.                                                                                                                                 |
| 90<br>days  | BB 63-48         | -                                                    | -                                                                    | <i>Pseudomonas</i> sp.<br><i>Methylobacterium</i><br><i>extorquens</i> | <i>Pseudomonas</i> sp.                                                                                                                                 |
|             | BB 63-58<br>(AT) | <i>Pseudomonas</i><br>sp.                            | <i>Pseudomonas</i> sp.                                               | <i>Pseudomonas</i> sp.<br><i>Bacillus</i> sp.                          | <i>Pseudomonas</i> sp.<br><i>Mesorhizobium</i><br><i>australicum</i>                                                                                   |
|             | BB 63-58<br>(AB) | <i>Pseudomonas</i><br>sp.<br><i>Arthrobacter</i> sp. | <i>Pseudomonas</i> sp.<br><i>Variovorax</i><br><i>boronicumulans</i> | <i>Pseudomonas</i> sp.                                                 | <i>Pseudomonas</i> sp.                                                                                                                                 |
| 120<br>days | BB 63-48         | -                                                    | -                                                                    | <i>Pseudomonas</i> sp.                                                 | <i>Pseudomonas</i> sp.<br><i>Sphingobium xenophagum</i><br><i>Variovorax ginsengisoli</i><br><i>Brevundimonas vesicularis</i><br><i>Roseomonas</i> sp. |
|             | BB 63-58<br>(AT) | <i>Pseudomonas</i><br>sp.                            | <i>Pseudomonas</i> sp.                                               | <i>Pseudomonas</i> sp.                                                 | <i>Pseudomonas</i> sp.<br><i>Mesorhizobium</i><br><i>australicum</i>                                                                                   |
|             | BB 63-58<br>(AB) | <i>Pseudomonas</i><br>sp.                            | <i>Pseudomonas</i> sp.<br><i>Rhodopseudomonas</i><br>sp.             | <i>Pseudomonas</i> sp.<br><i>Arthrobacter oryzae</i>                   | <i>Pseudomonas</i> sp.                                                                                                                                 |

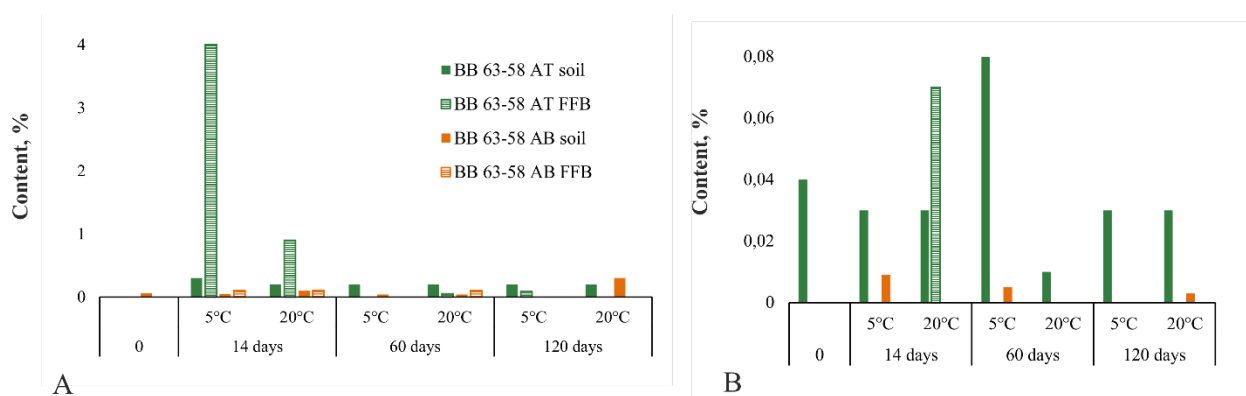

**Figure 3.** Content (%) of (A) phylum *Saccharibacteria*; (B) genus *Opitutus*
